# Supplementary material for: Titanium complexes bearing oxa- and azacalix[4, 6]arenes: structural studies and use in the ring opening homo-/co-polymerization of cyclic esters
Source: Royal Society of Chemistry journal article supplement (doi:10.1039/d1dt00189b), 2021-01-01
Supplement: d1dt00189b1.pdf [file d1dt00189b1.pdf]

## Electronic Supplementary Information

### Titanium complexes bearing oxa- and azacalix[4, 6]arenes: structural studies and use in the ring opening homo-/co-polymerization of cyclic esters.

Tian Xing,<sup>a</sup> Timothy J. Prior,<sup>a</sup> Kai Chen,<sup>b</sup> and Carl Redshaw<sup>a\*</sup>

<sup>a</sup> *Plastics Collaboratory, Department of Chemistry, University of Hull, Cottingham Road, Hull, HU6 7RX, UK.*

<sup>b</sup> *Collaborative Innovation Center of Atmospheric Environment and Equipment Technology, Jiangsu Key Laboratory of Atmospheric Environment Monitoring and Pollution Control, School of Environmental Science and Engineering, Nanjing University of Information Science & Technology, Nanjing 210044, P. R. China.*

#### Crystallographic data

Bond lengths and angles for **1-7**.

#### ROP studies

**Figure S1.** Mass spectrum of PCL synthesized with **4**/BnOH (run 10, Table 1).

**Figure S2.** Mass spectrum of PVL synthesized with **7**/BnOH (run 13, Table 2).

**Figure S3.** Mass spectrum of PLA synthesized with **3**/BnOH (run 3, Table 3).

**Figure S4.** <sup>1</sup>H NMR spectrum (CDCl<sub>3</sub>, 400 MHz, 298 K) of the PCL synthesized with **1**/BnOH (run 17, Table 1).

**Figure S5.** <sup>1</sup>H NMR spectrum (CDCl<sub>3</sub>, 400 MHz, 298 K) of the PVL synthesized with **5**/BnOH (run 11, Table 2).

**Figure S6.** <sup>1</sup>H NMR spectrum (CDCl<sub>3</sub>, 400 MHz, 298 K) of the PLA synthesized with **2**/BnOH (run 2, Table 3).

**Figure S7.**  $^1\text{H}$  NMR spectrum ( $\text{CDCl}_3$ , 400 MHz, 298 K) of the PLA-PCL synthesized with 4/BnOH (run 4, Table 4).

**Figure S8.** 2D J-resolved  $^1\text{H}$  NMR spectrum ( $\text{CDCl}_3$ , 400 MHz, 298 K) of the PLA synthesized with 1/BnOH (run 1, Table 3).

**Figure S9.** Carbonyl range of  $^{13}\text{C}$  NMR spectrum ( $\text{CDCl}_3$ , 25 °C) of PLA-PCL co-polymer. Triads have been assigned according to the literature.

**Equation S1.** Determination of number-average sequence length for CL

**Equation S2.** Determination of number-average sequence length for LA.

**Figure S10.** Picture of complex 1-7.

### Crystallographic data

Selected bond lengths (Å) and angles (°):

For **1**·3.5MeCN: O(1)-Ti(1) 1.828(3), O(3)-Ti(1) 1.844(3), O(4)-Ti(2) 2.029(3), O(4)-Ti(1) 2.070(3), O(5)-Ti(2) 1.877(3), O(7)-Ti(2) 1.821(3), O(8)-Ti(2) 2.019(3), O(8)-Ti(1) 2.081(3), O(9)-Ti(1) 1.796(3), O(10)-Ti(2) 1.764(3), Ti(2)-O(4)-Ti(1) 106.35(13), Ti(2)-O(8)-Ti(1) 106.31(13), O(9)-Ti(1)-O(1) 99.39(14), O(9)-Ti(1)-O(3) 99.09(13), O(1)-Ti(1)-O(3) 102.70(13), O(9)-Ti(1)-O(4) 94.94(12), O(1)-Ti(1)-O(4) 159.26(12), O(3)-Ti(1)-O(4) 89.65(12).

For **2**·MeCN: O(9)-Ti(1) 2.313(6), O(1)-Ti (1) 1.785(3), O(2)-Ti (2) 1.814(3), O(3)-Ti (2) 1.818(3), O(4)-Ti(2) 1.803(3), O(5)-Ti(1) 1.788(3), O(10)-Ti(1) 1.890(3), O(6)-Ti(1) 2.032(3), C(1)-O(1)-Ti(1) 152.1(3), C(12)-O(2)-Ti(2) 147.4(3), C(23)-O(3)-Ti(2) 155.7(3), C(35)-O(4)-Ti(2) 163.6(3), C(46)-O(5)-Ti(1) 163.4(3), C(57)-O(6)-Ti(1) 122.3(2), O(1)-Ti(1)-O(5) 103.74(15), O(1)-Ti(1)-O(10) 95.97(14), O(5)-Ti(1)-O(10) 105.68(14), O(1)-Ti(1)-O(6) 95.53(12), O(5)-Ti(1)-O(6) 95.36(13), O(10)-Ti(1)-O(6) 152.80(12).

For **3**·2.5MeCN: Ti(1)-O(2) 1.762(2), Ti(1)-O(3) 1.822(2), Ti(1)-F(1) 1.8342(19), Ti(1)-F(14) 2.0018(18), Ti(1)-F(3) 2.0315(19), Ti(1)-F(2) 2.0326(19), Ti(2)-F(6) 1.771(2), Ti(2)-F(5) 1.780(2), Ti(2)-F(4) 1.781(2), Ti(2)-F(3) 1.944(2), Ti(2)-F(8) 1.9679(18), Ti(2)-F(12) 1.988(2), O(2)-Ti(1)-O(3) 95.06(11), O(2)-Ti(1)-F(1) 98.77(10), O(3)-Ti(1)-F(1) 97.97(9), O(2)-Ti(1)-F(14) 94.02(9), O(3)-Ti(1)-F(14) 91.73(9), F(1)-Ti(1)-F(14) 163.16(9), O(2)-Ti(1)-F(3) 87.41(10), O(3)-Ti(1)-F(3) 175.51(9), F(1)-Ti(1)-F(3) 85.33(8), F(6)-Ti(2)-F(5) 97.59(10), F(6)-Ti(2)-F(4) 96.63(10), F(5)-Ti(2)-F(4) 95.67(10), F(6)-Ti(2)-F(3) 167.61(9).

For 4·3.5MeCN: O(1)-Ti(1) 1.8975(11), O(3)-Ti(2) 1.8341(11), O(4)-Ti(2) 1.8809(11), O(6)-Ti(1) 1.8324(11), O(7)-Ti(1) 1.8202(10), O(7)-Ti(2) 1.8245(10), Cl(1)-Ti(1) 2.4861(5), Cl(2)-Ti(1) 2.4311(5), Cl(3)-Ti(2) 2.4104(4), Cl(4)-Ti(2) 2.4863(5), Ti(1)-O(8) 2.1445(12), Ti(2)-O(9) 2.1570(11), Ti(1)-O(7)-Ti(2) 168.84(6), O(7)-Ti(1)-O(6) 99.11(5), O(7)-Ti(1)-O(1) 92.62(5), O(6)-Ti(1)-O(1) 98.13(5), O(7)-Ti(1)-O(8) 85.85(5), O(6)-Ti(1)-O(8) 172.84(5), O(1)-Ti(1)-O(8) 86.74(5) O(7)-Ti(1)-Cl(2) 170.03(4), O(6)-Ti(1)-Cl(2) 90.54(4), O(1)-Ti(1)-Cl(2) 88.45(3) O(8)-Ti(1)-Cl(2) 84.32(4).

For 5·4.5MeCN: O(1)-Ti(1) 1.883(3), O(3)-Ti(2) 1.825(3), O(4)-Ti(2) 1.869(3), O(6)-Ti(1) 1.828(3), O(7)-Ti(2) 1.817(3), O(7)-Ti(1) 1.817(3), Br(1)-Ti(1) 2.6748(8), Br(2)-Ti(1) 2.6040(9), Br(3)-Ti(2) 2.5796(9), Br(4)-Ti(2) 2.6647(9), Ti(1)-O(8) 2.134(3), Ti(2)-O(9) 2.152(3), Ti(2)-O(7)-Ti(1) 172.65(17), O(7)-Ti(1)-O(6) 100.63(13), O(7)-Ti(1)-O(1) 94.90(12), O(6)-Ti(1)-O(1) 99.19(13), O(7)-Ti(1)-O(8) 86.50(13), O(6)-Ti(1)-O(8) 171.03(13), O(1)-Ti(1)-O(8) 85.49(13), O(7)-Ti(1)-Br(2) 168.80(9), O(6)-Ti(1)-Br(2) 89.29(9), O(1)-Ti(1)-Br(2) 88.59(9), O(8)-Ti(1)-Br(2) 83.15(9), O(7)-Ti(1)-Br(1) 88.29(8), O(6)-Ti(1)-Br(1) 91.97(8), O(1)-Ti(1)-Br(1) 167.59(10), O(8)-Ti(1)-Br(1) 82.74(9).

For 6·7MeCN: Ti(1)-O(1) 1.779(4), Ti(1)-N(2) 2.236(6), Ti(1)-Br(2) 2.4939(13), Ti(1)-Br(1) 2.5058(15), Ti(1)-Br(3) 2.5064(15), Ti(1)-Br(4) 2.5423(13), Ti(2)-O(2) 1.755(4), Ti(2)-O(3) 1.820(4), Ti(2)-N(4) 2.194(5), Ti(2)-N(3) 2.245(5), Ti(2)-Br(6) 2.4998(11), Ti(2)-Br(5) 2.5280(11), O(1)-Ti(1)-N(2) 176.3(2), O(1)-Ti(1)-Br(2) 98.72(14), N(2)-Ti(1)-Br(2) 82.18(15), O(1)-Ti(1)-Br(1) 97.79(15), N(2)-Ti(1)-Br(1) 85.75(17), Br(2)-Ti(1)-Br(1) 90.42(5), O(1)-Ti(1)-Br(3) 91.34(15), O(2)-Ti(2)-O(3) 98.68(18), O(2)-Ti(2)-N(4) 94.27(19), O(3)-Ti(2)-N(4) 165.59(19), O(2)-Ti(2)-N(3) 175.84(18), O(3)-Ti(2)-N(3) 85.48(17), N(4)-Ti(2)-N(3) 81.58(19), O(2)-Ti(2)-Br(6) 95.06(14).

For 6·7MeCN: O(1)-Ti(1) 1.792(5), O(2)-Ti(1) 1.801(4), O(3)-Ti(2) 1.789(4), O(4)-Ti(2) 1.791(5), F(1)-Ti(1) 1.802(3), F(2)-Ti(1) 2.035(3), F(2)-Ti(2) 2.064(3), F(3)-Ti(2) 2.023(4), F(3)-Ti(1) 2.049(4), F(4)-Ti(1) 2.012(4), F(4)-Ti(2) 2.055(4), F(5)-Ti(2) 1.799(3), O(1)-Ti(1)-O(2) 97.67(19), O(1)-Ti(1)-F(1) 100.70(19), O(2)-Ti(1)-F(1) 101.88(19), O(1)-Ti(1)-F(4) 162.69(19), F(1)-Ti(1)-F(4) 90.92(16), O(1)-Ti(1)-F(2) 91.46(18), F(1)-Ti(1)-F(2) 159.36(16), O(2)-Ti(1)-F(4) 92.36(18), O(4)-Ti(1)-F(2) 73.92(15), O(2)-Ti(1)-F(2) 92.85(17).

# ROP studies

## National Mass Spectrometry Facility (NMSF), Swansea

D:\Data\NMSF\2021\Feb21\HULRED-FKCV-UM-A\0\_O23\1\1SLin

Comment 1 Prof. Redshaw TIN[6]-PCL MW=5k(poly)?? PosLin THF [1:10] (DCTB:THF) +NaOAc

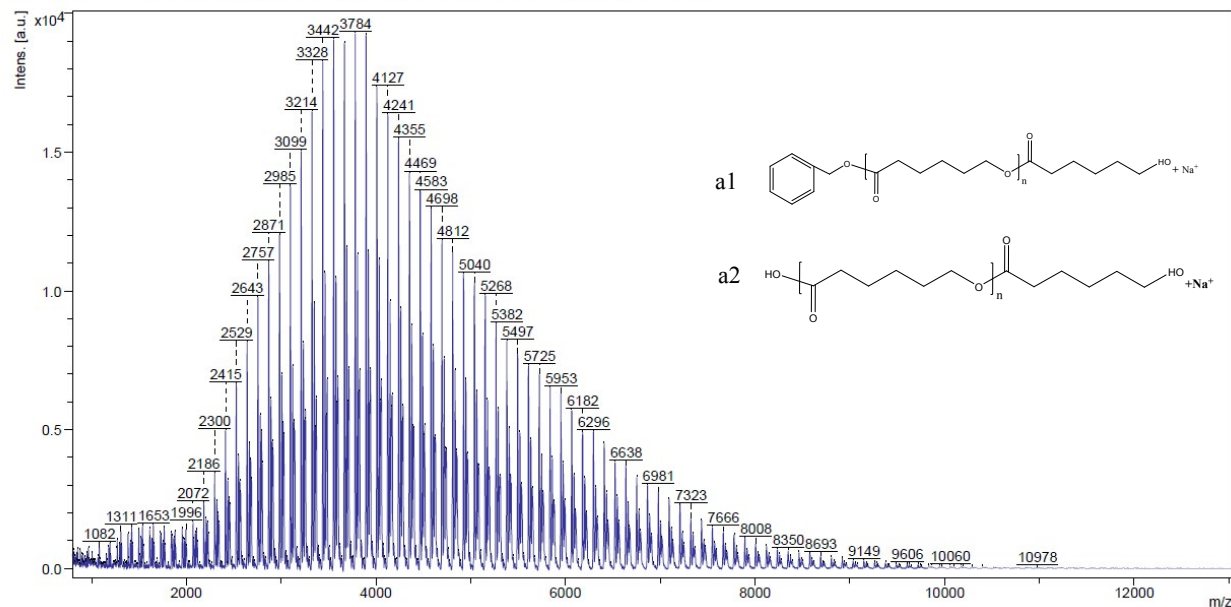

ultrafleXtreme MALDI

Date of Acquisition 2021-02-27T16:08:08.163+00:00

Printed 28/02/2021 15:40:55

## National Mass Spectrometry Facility (NMSF), Swansea

D:\Data\NMSF\2021\Feb21\HULRED-FKCV-UM-A\0\_O23\1\1SLin

Comment 1 Prof. Redshaw TIN[6]-PCL MW=5k(poly)?? PosLin THF [1:10] (DCTB:THF) +NaOAc

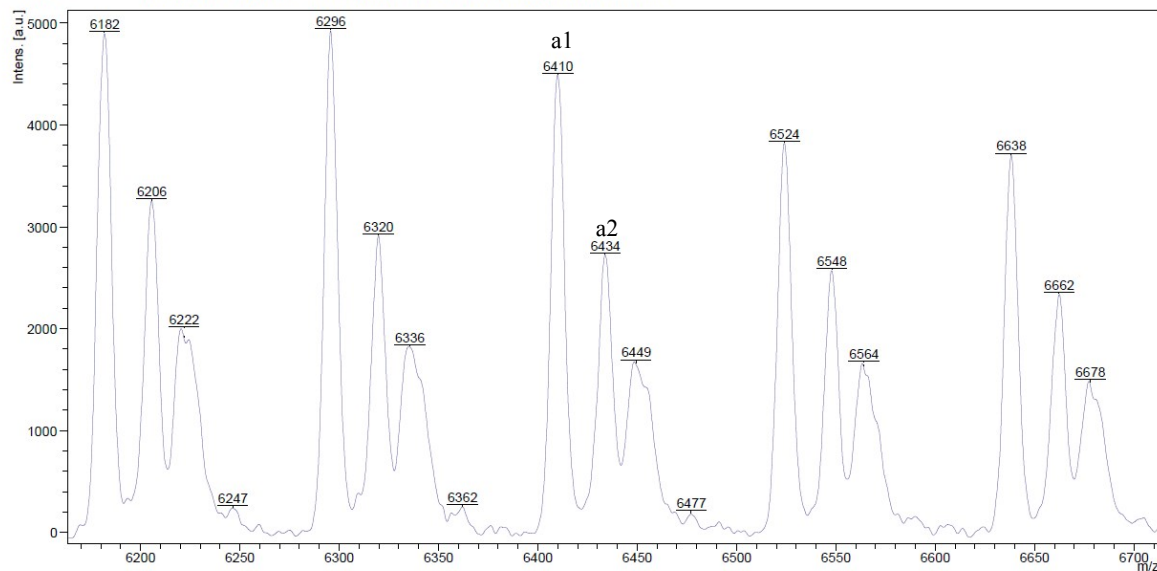

ultrafleXtreme MALDI

Date of Acquisition 2021-02-27T16:08:08.163+00:00

Printed 28/02/2021 15:48:21

## National Mass Spectrometry Facility (NMSF), Swansea

D:\Data\NMSF\2021\Feb21\HULRED-FKCV-UM-A\0\_O23\1\1SLin

Comment 1 Prof. Redshaw TIN[6]-PCL MW=5k(poly)?? PosLin THF [1:10] (DCTB;THF) +NaOAc

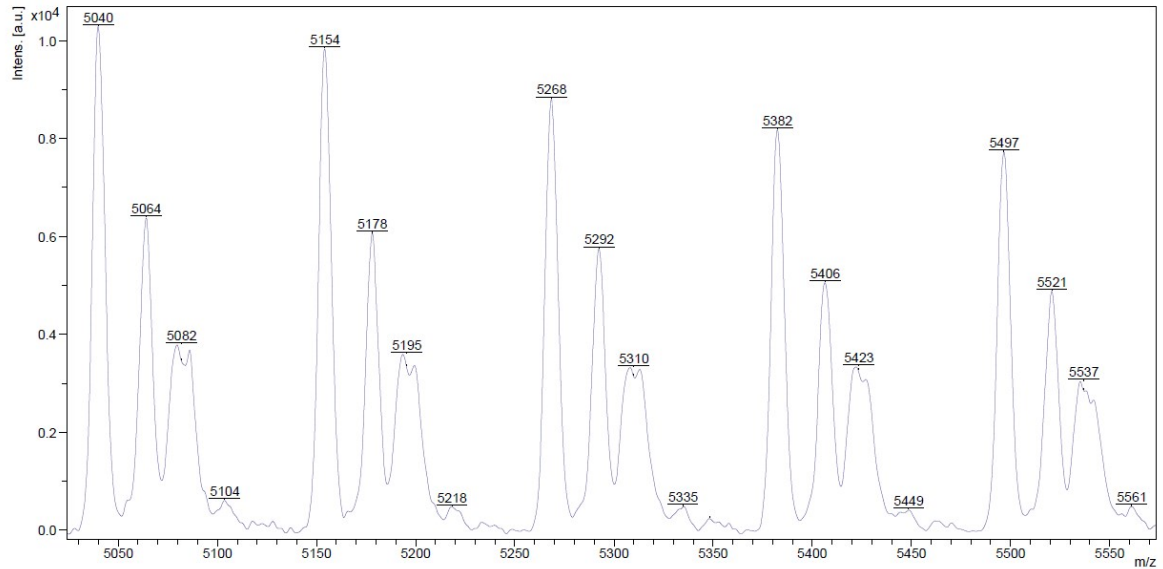

ultrafleXtreme MALDI

Date of Acquisition 2021-02-27T16:08:08.163+00:00

Printed 28/02/2021 15:48:01

## National Mass Spectrometry Facility (NMSF), Swansea

D:\Data\NMSF\2021\Feb21\HULRED-FKCV-UM-B\0\_O23\1\1SRef

Comment 1 Prof. Redshaw TIN[6]-PCL MW=5k(poly)?? PosRef THF [1:10] (DCTB;THF) +NaOAc

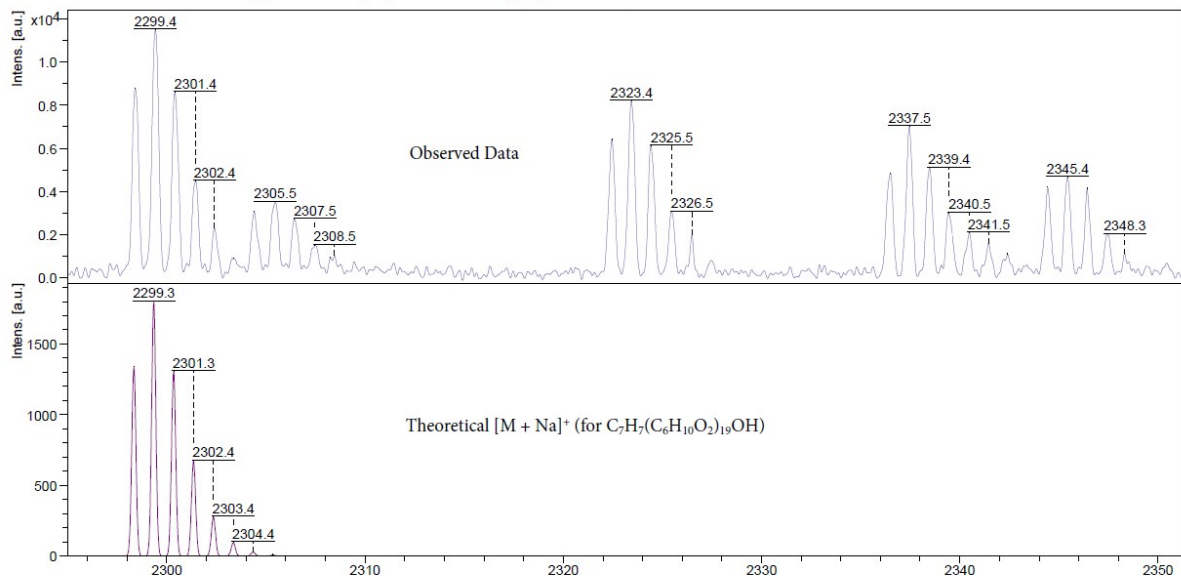

ultrafleXtreme MALDI

Date of Acquisition 2021-02-27T16:27:49.331+00:00

Printed 28/02/2021 16:24:37

National Mass Spectrometry Facility (NMSF), Swansea

D:\Data\NMSF\2021\Feb21\HULRED-FKCV-UM-B\0\_O23\1\1SRef

Comment 1 Prof. Redshaw TIN[6]-PCL MW=5k(poly)?? PosRef THF [1:10] (DCTB:THF) +NaOAc

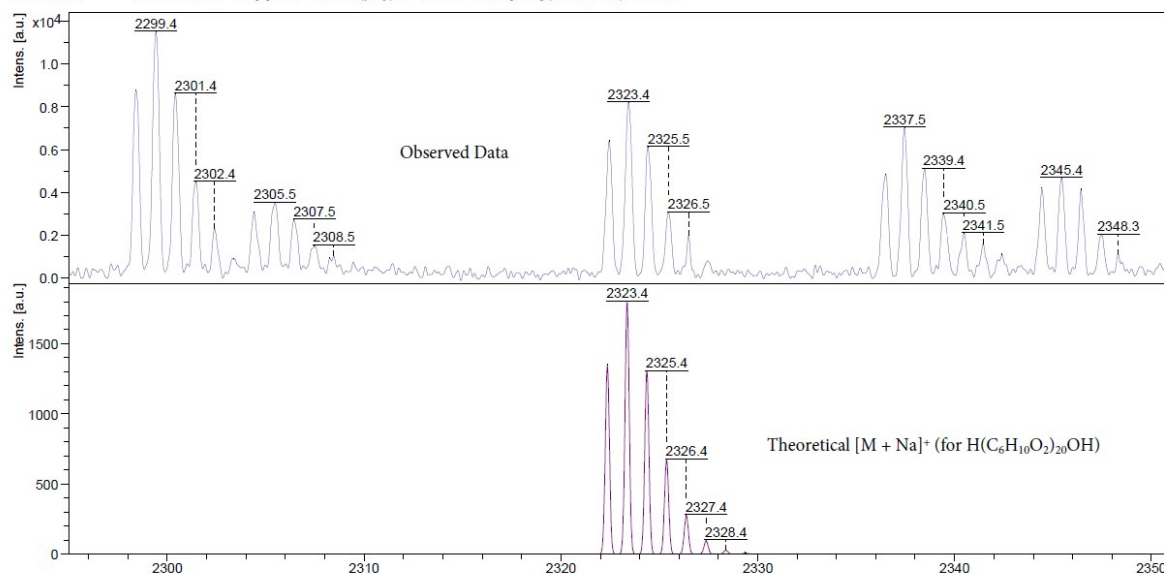

ultrafleXtreme MALDI

Date of Acquisition 2021-02-27T16:27:49.331+00:00

Printed 28/02/2021 16:21:55

National Mass Spectrometry Facility (NMSF), Swansea

D:\Data\NMSF\2021\Feb21\HULRED-FKCV-UM-B\0\_O23\1\1SRef

Comment 1 Prof. Redshaw TIN[6]-PCL MW=5k(poly)?? PosRef THF [1:10] (DCTB:THF) +NaOAc

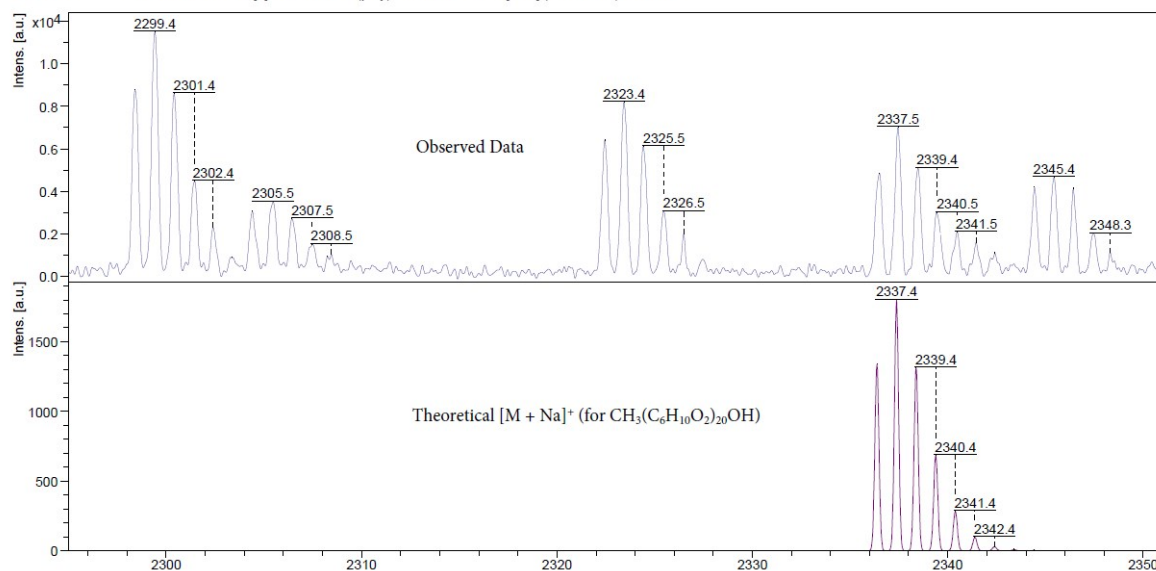

ultrafleXtreme MALDI

Date of Acquisition 2021-02-27T16:27:49.331+00:00

Printed 28/02/2021 16:23:28

Figure S1. Mass spectrum of PCL synthesized with 4/BnOH (run 10, Table 1).

National Mass Spectrometry Facility (NMSF), Swansea

D:\Data\NMSF\2021\Feb21\HULRED-FKCV7-UM-A\0\_O24\1\1SLin

Comment 1 Prof. Redshaw TiCIN[6]-PVL MW=6k(poly)?? PosLin THF [1:10] (DCTB;THF) +NaOAc

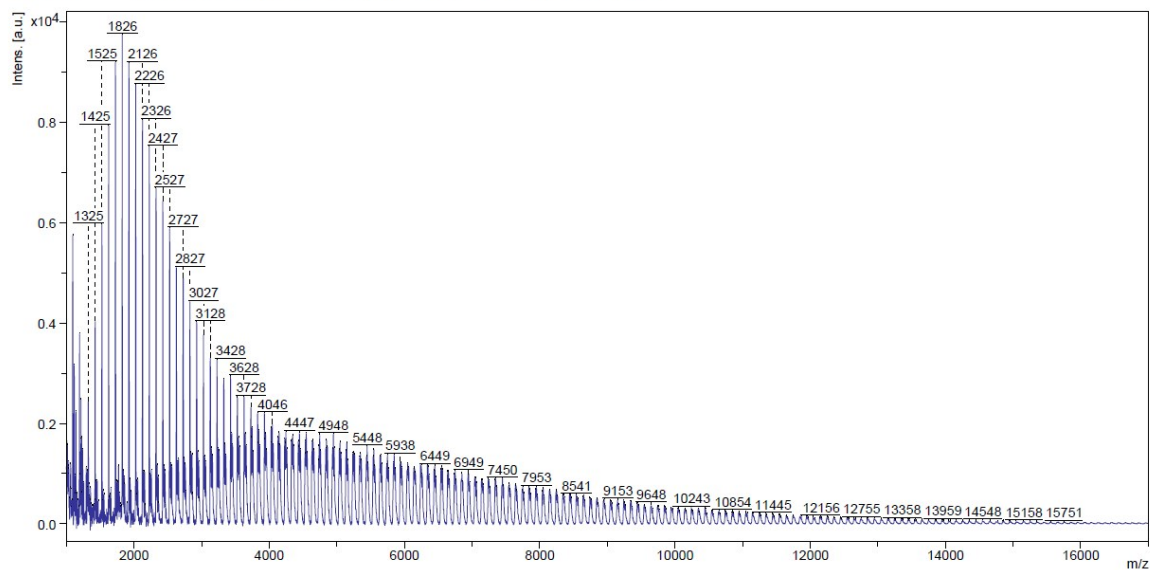

ultrafleXtreme MALDI Date of Acquisition 2021-02-27T16:13:37.043+00:00 Printed 28/02/2021 17:03:45

National Mass Spectrometry Facility (NMSF), Swansea

D:\Data\NMSF\2021\Feb21\HULRED-FKCV7-UM-A\0\_O24\1\1SLin

Comment 1 Prof. Redshaw TiCIN[6]-PVL MW=6k(poly)?? PosLin THF [1:10] (DCTB;THF) +NaOAc

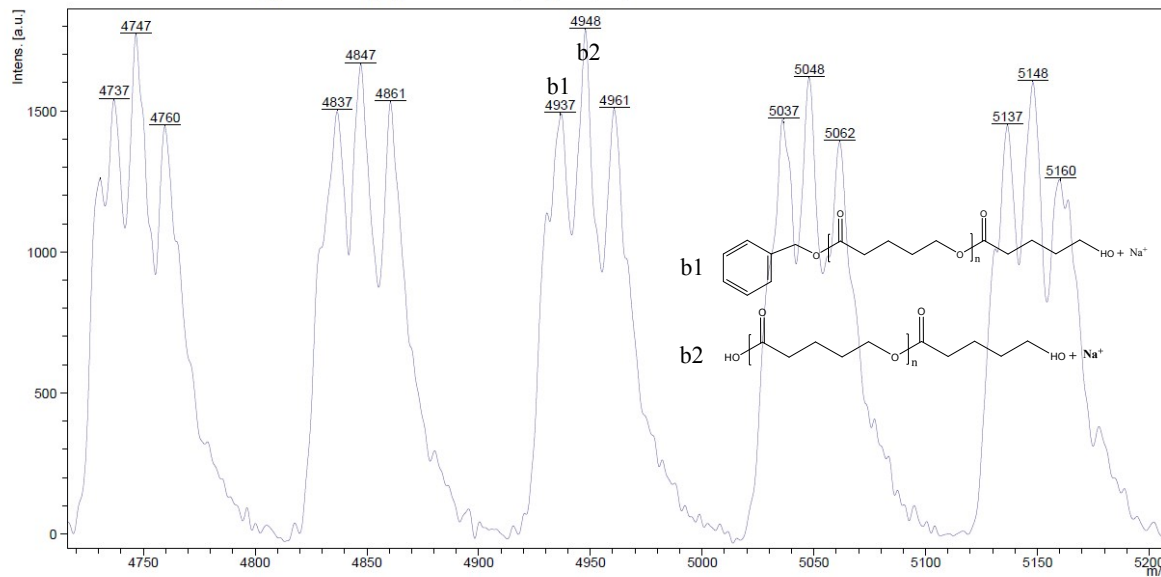

ultrafleXtreme MALDI Date of Acquisition 2021-02-27T16:13:37.043+00:00 Printed 28/02/2021 17:07:22



## National Mass Spectrometry Facility (NMSF), Swansea

D:\Data\NMSF\2021\Feb21\HULRED-FKCV7-UM-A\0\_O24\1\1SLin

Comment 1 Prof. Redshaw TICIN[6]-PVL MW=6k(poly)?? PosLin THF [1:10] (DCTB;THF) +NaOAc

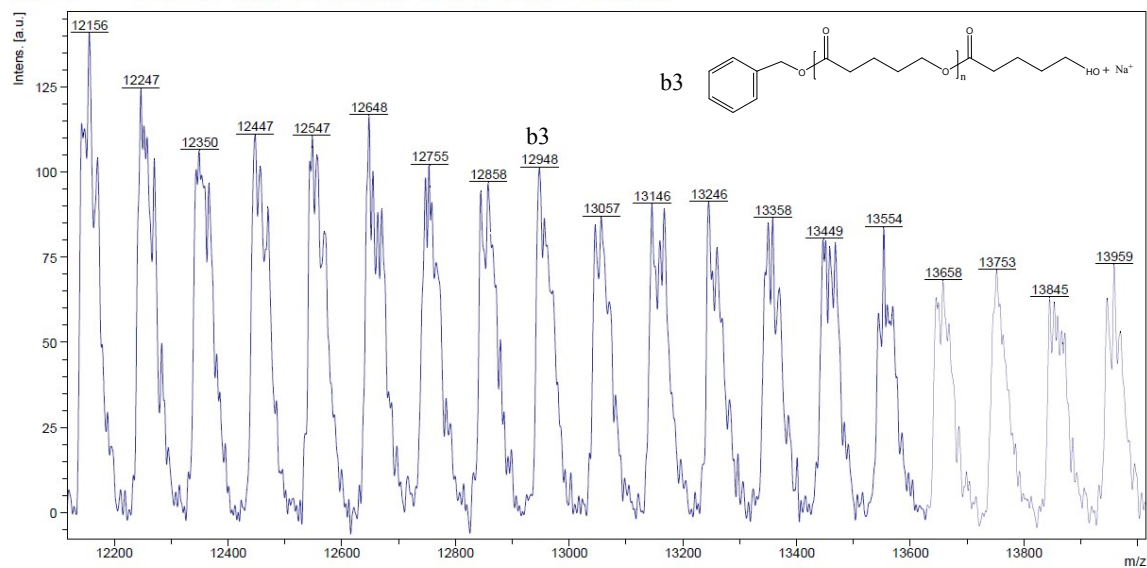

ultrafleXtreme MALDI

Date of Acquisition 2021-02-27T16:13:37.043+00:00

Printed 28/02/2021 17:09:17

## National Mass Spectrometry Facility (NMSF), Swansea

D:\Data\NMSF\2021\Feb21\HULRED-FKCV7-UM-B\0\_O24\1\1SRef

Comment 1 Prof. Redshaw TICIN[6]-PVL MW=6k(poly)?? PosRef THF [1:10] (DCTB;THF) +NaOAc

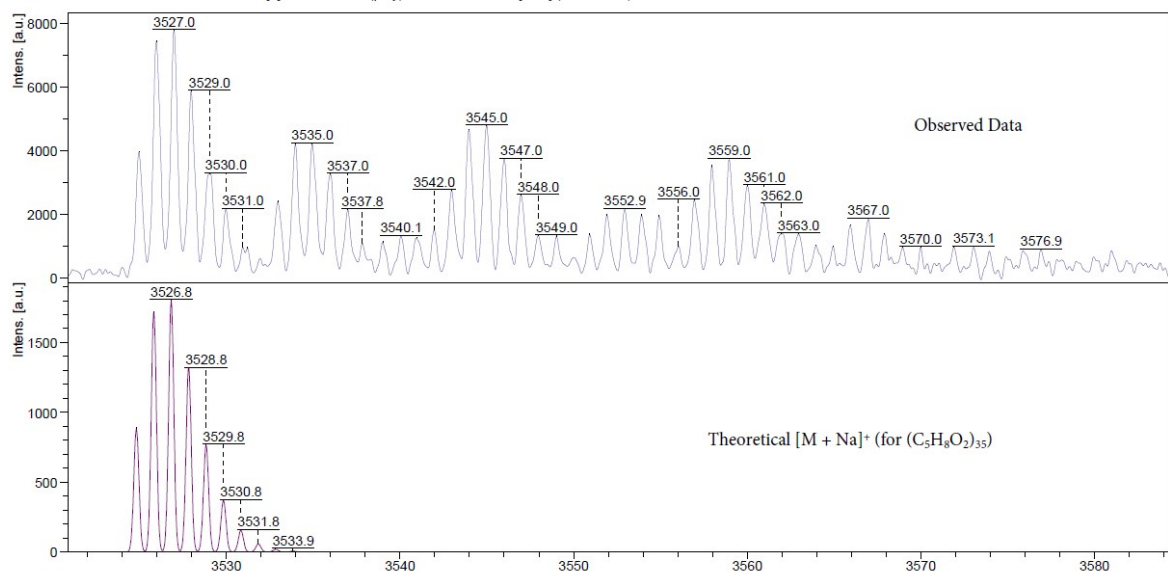

ultrafleXtreme MALDI

Date of Acquisition 2021-02-27T16:32:18.549+00:00

Printed 28/02/2021 19:03:04



## National Mass Spectrometry Facility (NMSF), Swansea

D:\Data\NMSF\2021\Feb21\HULRED-FKCV7-UM-B\0\_O24\1\1SRef

Comment 1 Prof. Redshaw TICIN[6]-PVL MW=6k(poly)?? PosRef THF [1:10] (DCTB;THF) +NaOAc

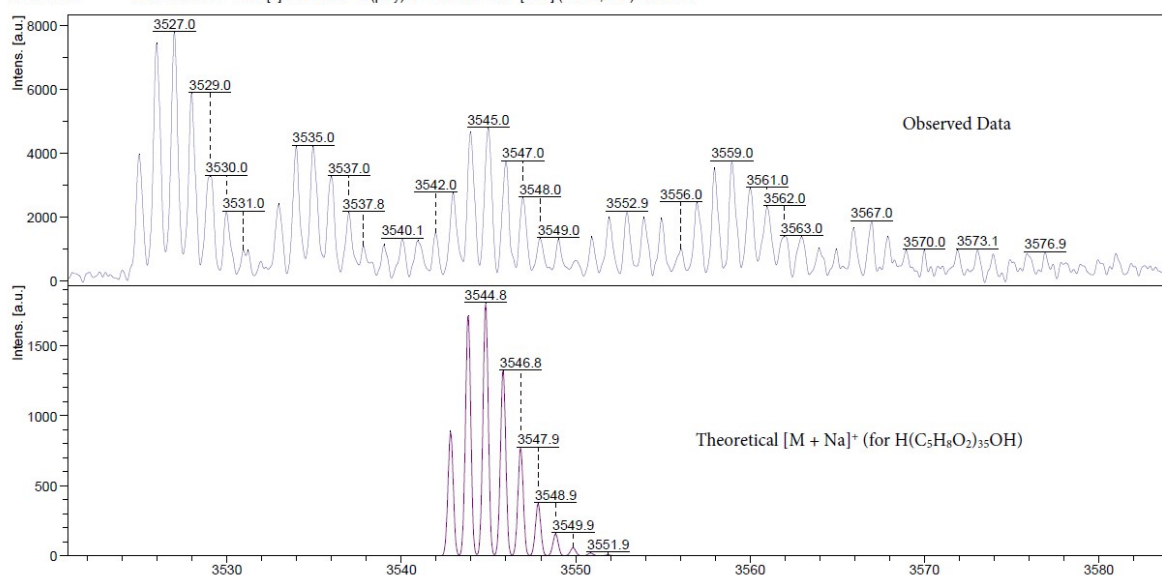

ultrafleXtreme MALDI

Date of Acquisition 2021-02-27T16:32:18.549+00:00

Printed 28/02/2021 19:03:37

## National Mass Spectrometry Facility (NMSF), Swansea

D:\Data\NMSF\2021\Feb21\HULRED-FKCV7-UM-B\0\_O24\1\1SRef

Comment 1 Prof. Redshaw TICIN[6]-PVL MW=6k(poly)?? PosRef THF [1:10] (DCTB;THF) +NaOAc

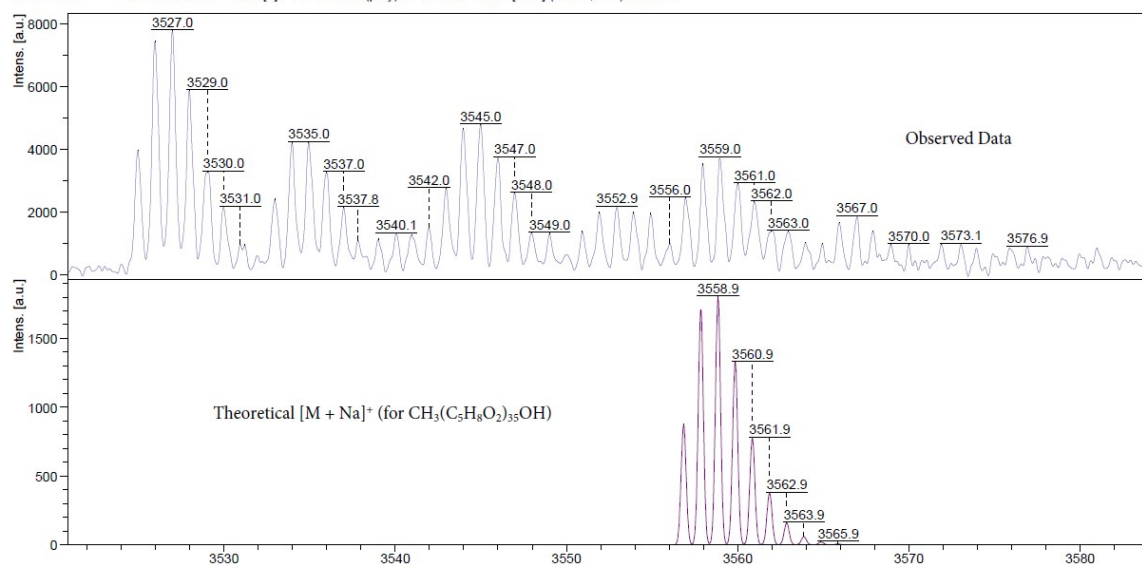

ultrafleXtreme MALDI

Date of Acquisition 2021-02-27T16:32:18.549+00:00

Printed 28/02/2021 19:04:46

**Figure S2.** Mass spectrum of PVL synthesized with 7/BnOH (run 13, Table 2).

National Mass Spectrometry Facility (NMSF), Swansea

D:\Data\NMSF\2020\December\HULRED-FJXFX-UM-A\0\_M1\1\1SLin  
 Comment 1 Prof. Redshaw TICIN[6]-PLA MW=5k(poly)?? PosLin THF? [1:5] (DCTB;THF) +NaOAc

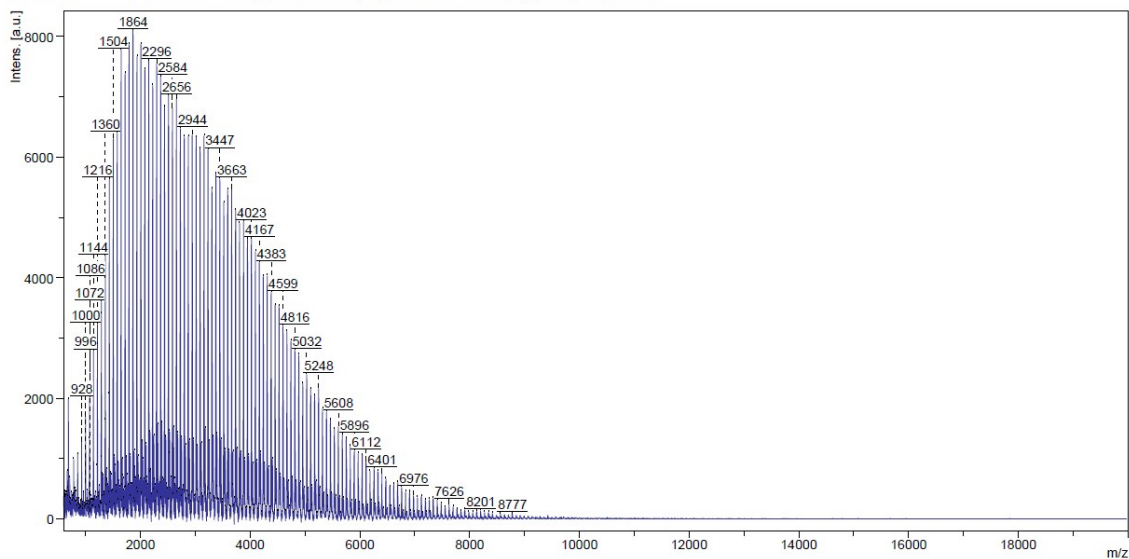

ultrafleXtreme MALDI Date of Acquisition 2020-12-20T16:31:45.484+00:00 Printed 22/12/2020 21:55:12

National Mass Spectrometry Facility (NMSF), Swansea

D:\Data\NMSF\2020\December\HULRED-FJXFX-UM-A\0\_M1\1\1SLin  
 Comment 1 Prof. Redshaw TICIN[6]-PLA MW=5k(poly)?? PosLin THF? [1:5] (DCTB;THF) +NaOAc

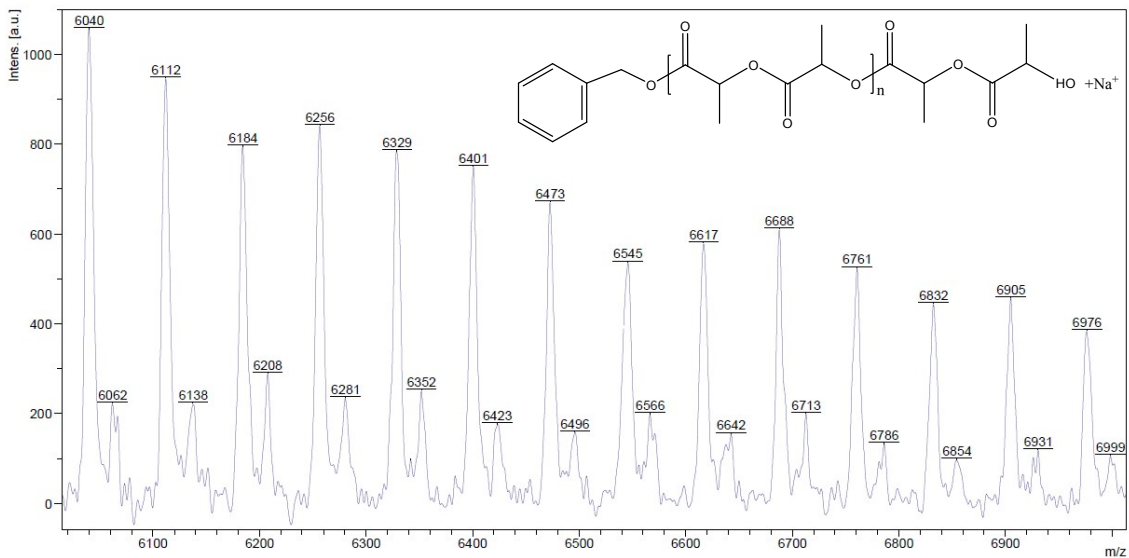

ultrafleXtreme MALDI Date of Acquisition 2020-12-20T16:31:45.484+00:00 Printed 22/12/2020 21:58:50

National Mass Spectrometry Facility (NMSF), Swansea

D:\Data\NMSF\2020\December\HULRED-FJFX-UM-B\0\_M1\1\1SRef

Comment 1 Prof. Redshaw TICIN[6]-PLA MW=5k(poly)?? PosRef THF? [1:5] (DCTB,THF) +NaOAc

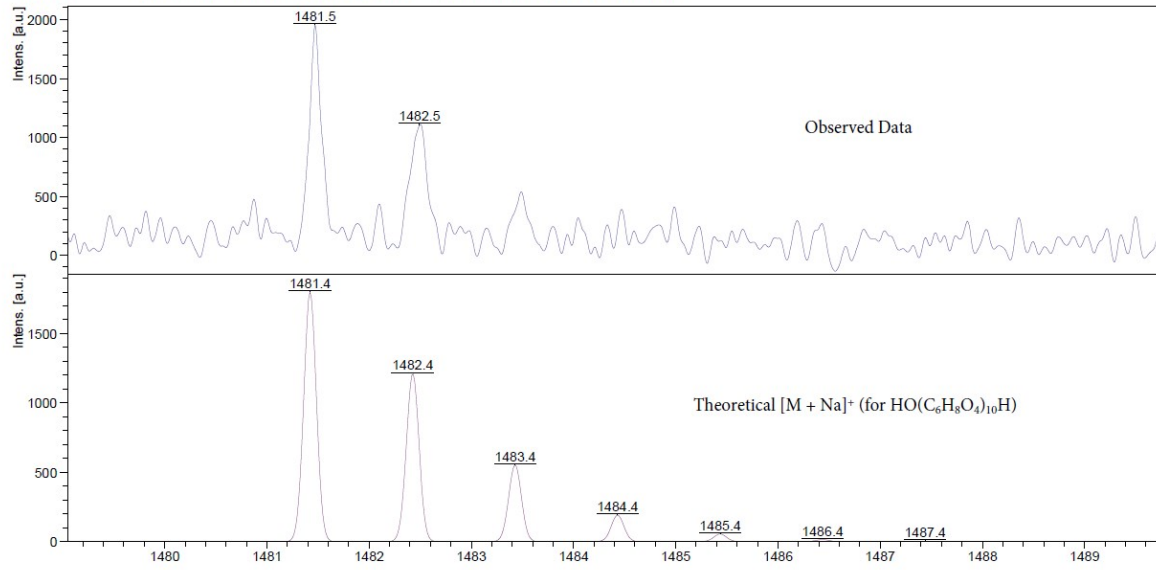

ultrafleXtreme MALDI

Date of Acquisition 2020-12-20T16:54:17.119+00:00

Printed 22/12/2020 22:41:29

National Mass Spectrometry Facility (NMSF), Swansea

D:\Data\NMSF\2020\December\HULRED-FJFX-UM-B\0\_M1\1\1SRef

Comment 1 Prof. Redshaw TICIN[6]-PLA MW=5k(poly)?? PosRef THF? [1:5] (DCTB,THF) +NaOAc

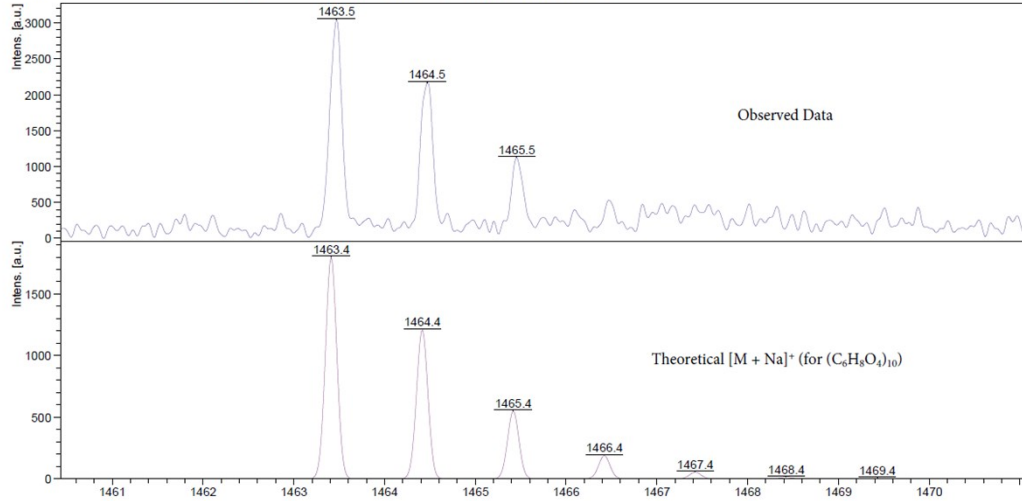

ultrafleXtreme MALDI

Date of Acquisition 2020-12-20T16:54:17.119+00:00

Printed 22/12/2020 22:42:17

**Figure S3.** Mass spectrum of PLA synthesized with 3/BnOH (run 3, Table 3).

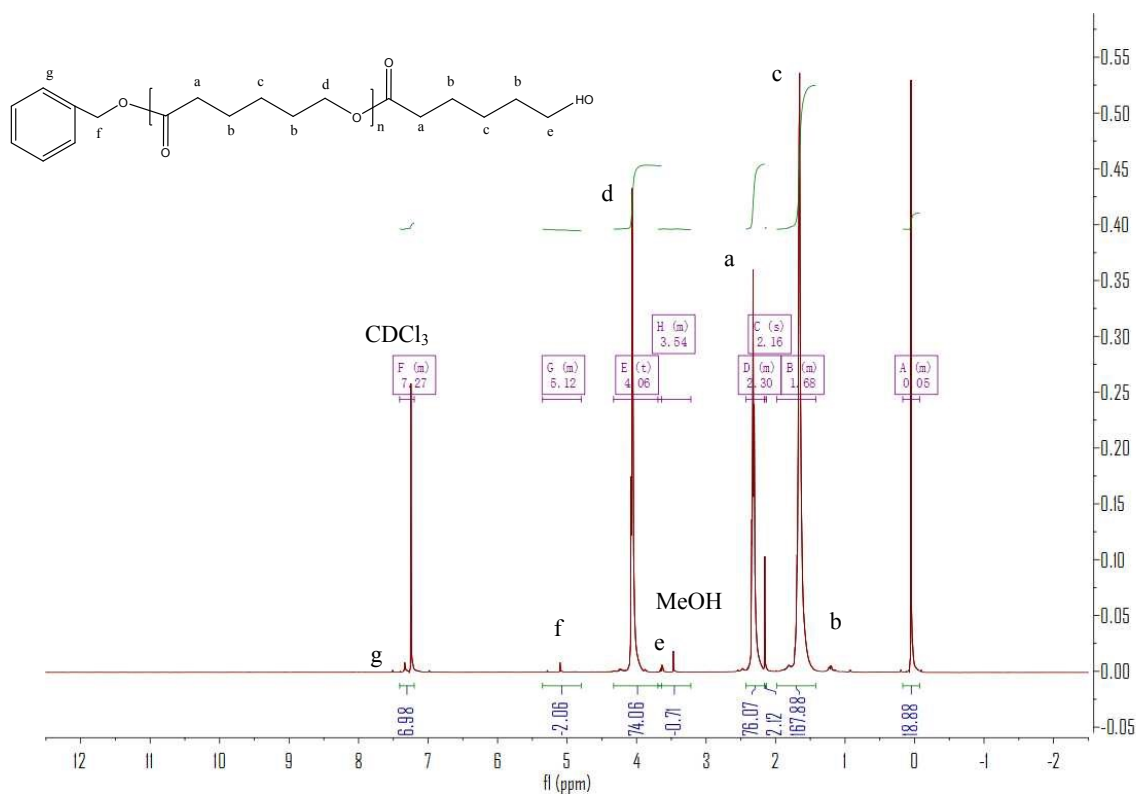

**Figure S4.**  $^1\text{H}$  NMR spectrum ( $\text{CDCl}_3$ , 400 MHz, 298 K) of the PCL synthesized with 1/BnOH (run 17, Table 1).

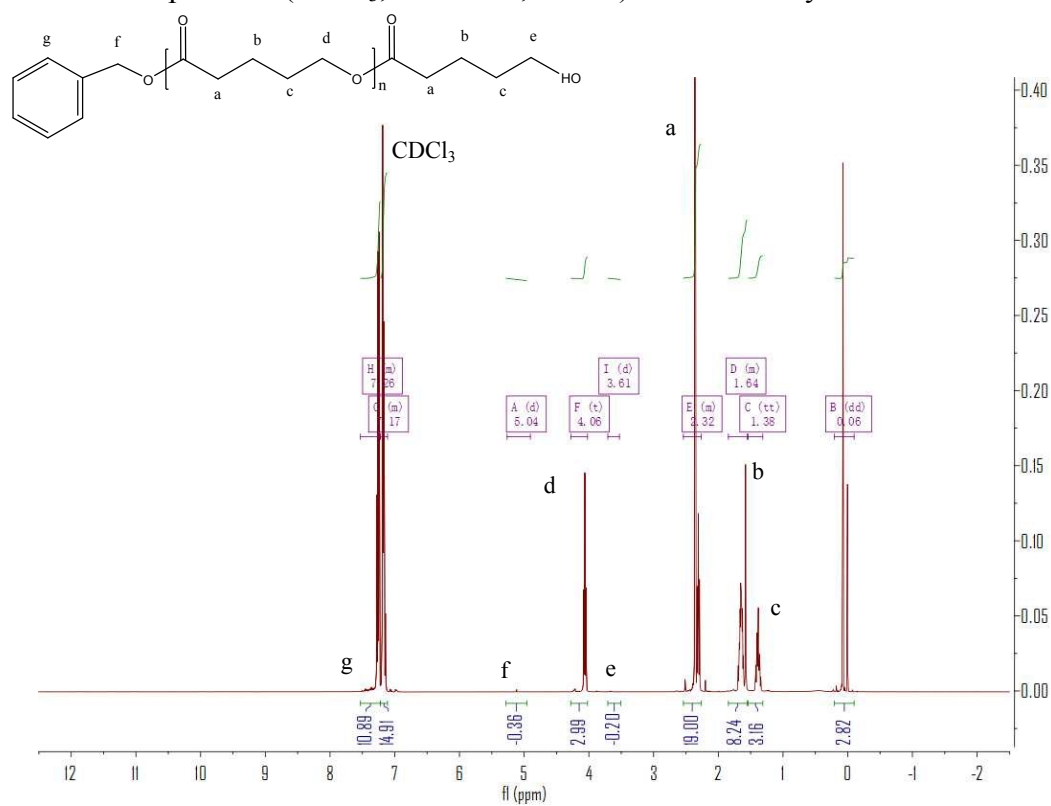

**Figure S5.**  $^1\text{H}$  NMR spectrum ( $\text{CDCl}_3$ , 400 MHz, 298 K) of the PVL synthesized with 5/BnOH (run 11, Table 2).

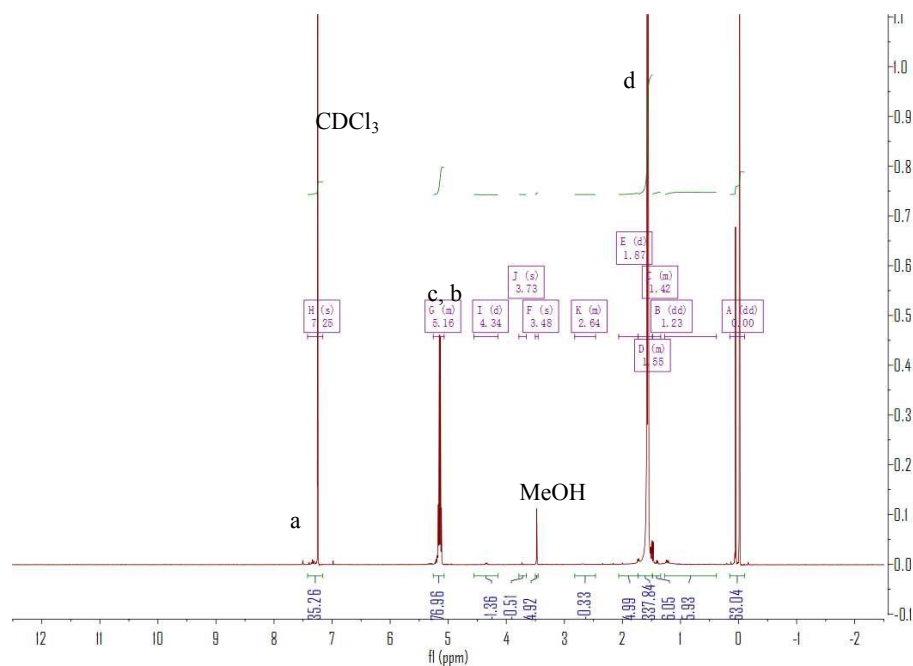

**Figure S6.** <sup>1</sup>H NMR spectrum (CDCl<sub>3</sub>, 400 MHz, 298 K) of the PLA synthesized with 2/BnOH (run 2, Table 3).

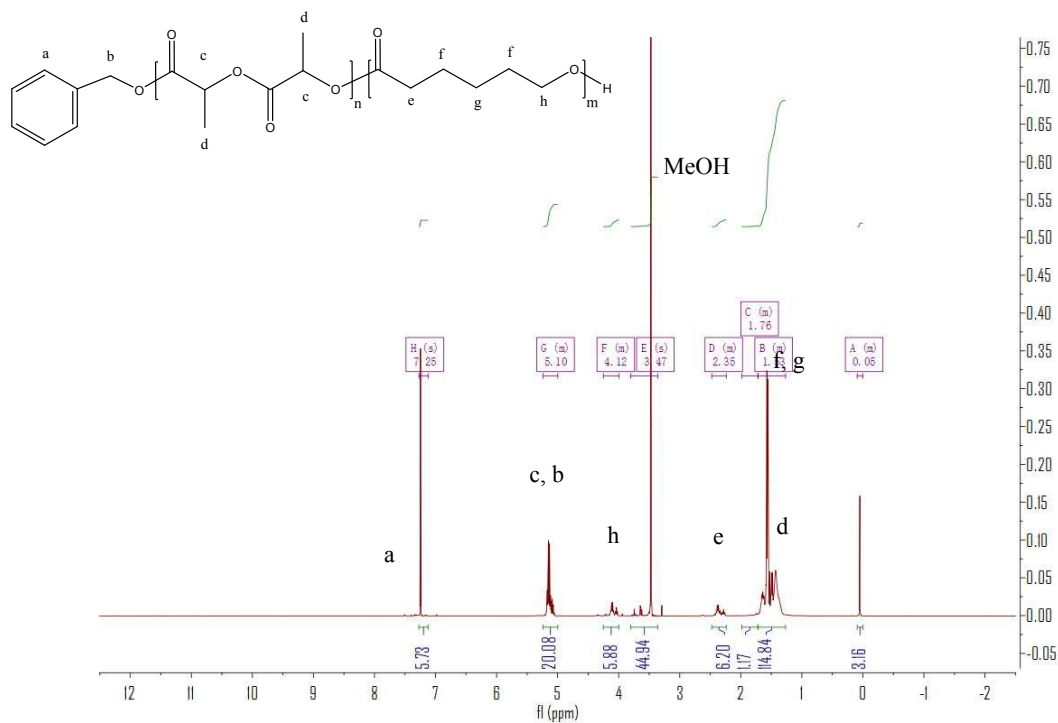

**Figure S7.** <sup>1</sup>H NMR spectrum (CDCl<sub>3</sub>, 400 MHz, 298 K) of the PLA-PCL copolymer synthesized with 6/BnOH (run 6, Table 4).

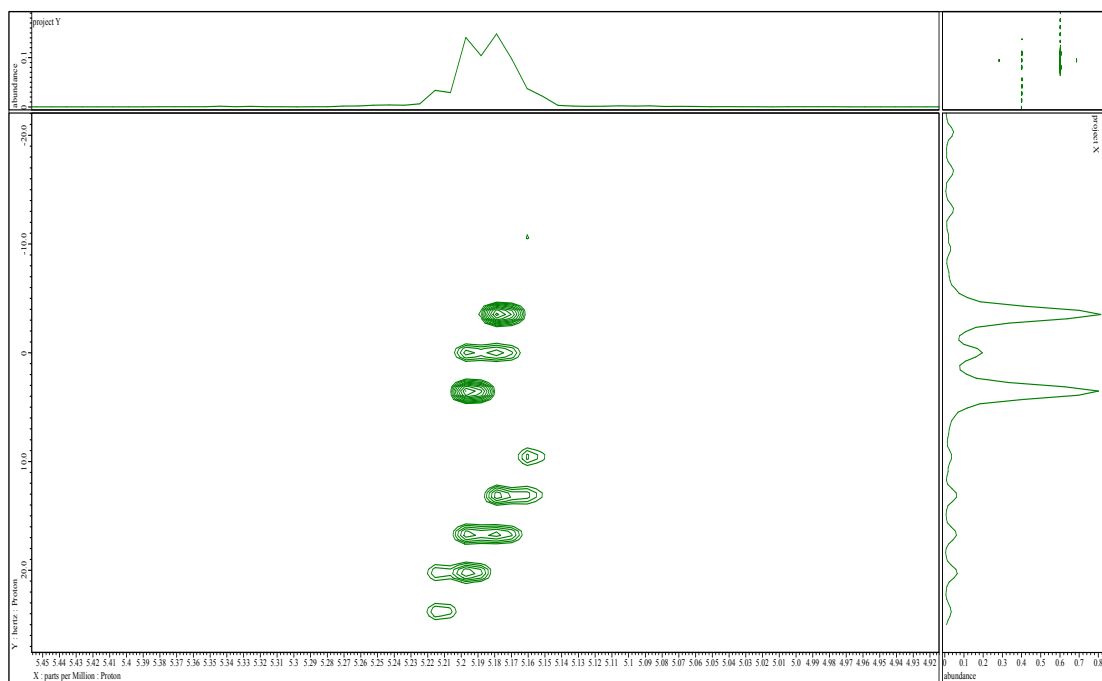

**Figure S8.** 2D  $J$ -resolved  $^1\text{H}$  NMR spectrum ( $\text{CDCl}_3$ , 400 MHz, 298 K) of the PLA synthesized with 1/BnOH (run 1, Table 3).

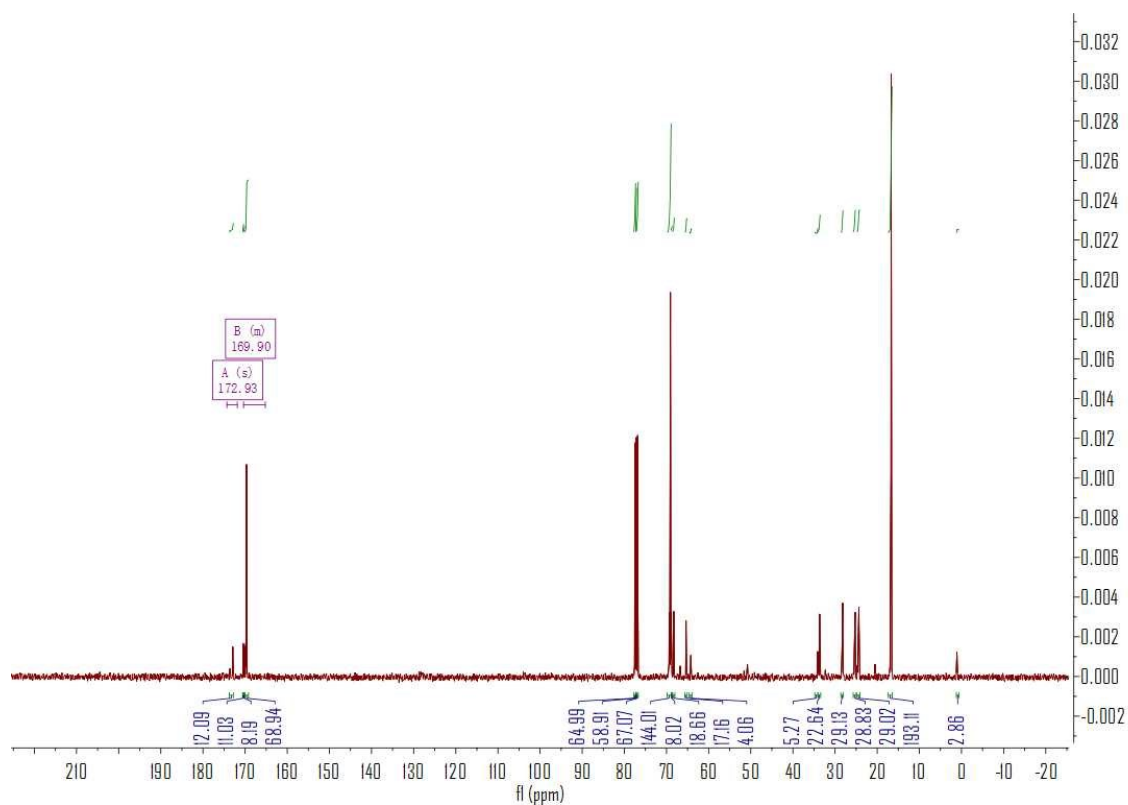



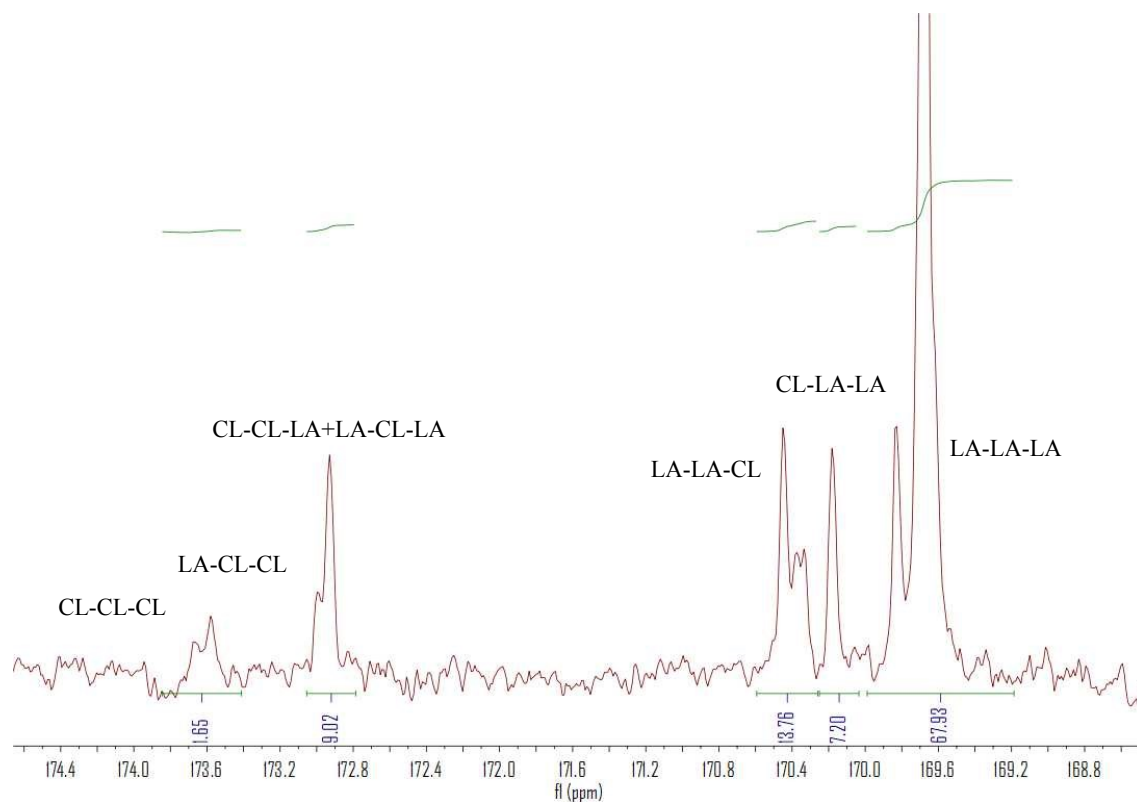

**Figure S9.** Carbonyl range of  $^{13}\text{C}$  NMR spectrum ( $\text{CDCl}_3$ , 25  $^\circ\text{C}$ ) of PLA-PCL co-polymer. Triads have been assigned according to the literature.<sup>[1]</sup>

**Equation S1.** Determination of number-average sequence length for CL<sup>[1]</sup>

$$L_{\text{CL}} = [(I_{\text{CL-CL-CL}} + I_{\text{LA-CL-CL}}) / (I_{\text{CL-CL-LA}} + I_{\text{LA-CL-LA}})] + 1$$

**Equation S2.** Determination of number-average sequence length for LA.<sup>[1]</sup>

$$L_{\text{LA}} = \{ [(I_{\text{LA-LA-LA}} + (I_{\text{LA-LA-CL}} + I_{\text{CL-LA-LA}}) / 2) / (I_{\text{CL-LA-CL}} + (I_{\text{LA-LA-CL}} + I_{\text{CL-LA-LA}}) / 2) + 1 \} / 2$$

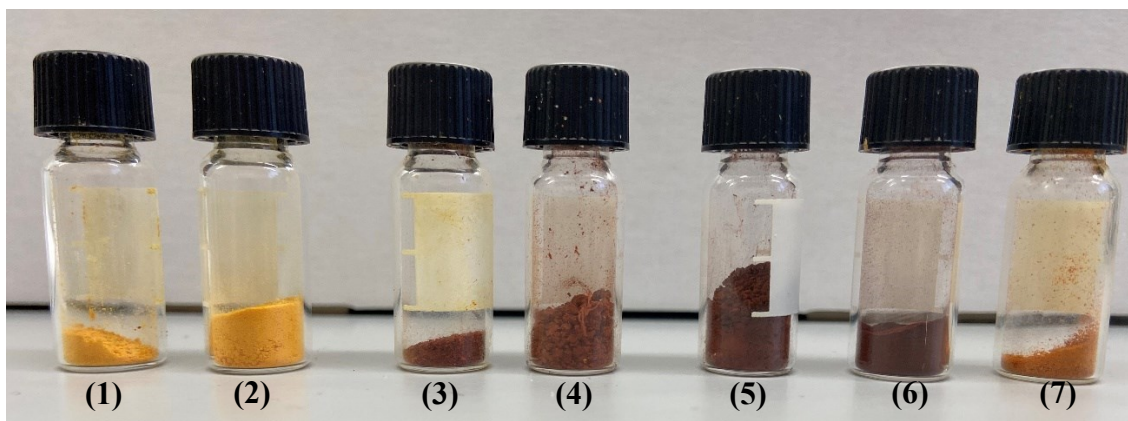

**Figure S10.** Picture of complexes 1-7.

[1] (a) F. Della Monica, E. Luciano, A. Buonerba, A. Grassi, S. Milione and Carmine Capacchione, *RSC Adv.* 2014, **4**, 51262–51267; (b) P. Vanhoorne, P. Dubois, R. Jerome and P. Teyssie, *Macromolecules* 1992, **25**, 37–44; (c) J. Kasperczyk and M. Bero, *Makromol. Chem.* 1991, **192**, 1777–1787; (d) J. Kasperczyk and M. Bero, *Makromol. Chem.* 1993, **194**, 913–925; (e) N. Nomura, A. Akita, R. Ishii and M. Mizuno, *J. Am. Chem. Soc.* 2010, **132**, 1750–1751; (f) G. Li, M. Lamberti, D. Pappalardo and Claudio Pellecchia *Macromolecules*, 2012, **45**, 8614–8620.
